# Supplementary material for: Phylogeographic Diversity Analysis of Bipolaris sorokiniana (Sacc.) Shoemaker Causing Spot Blotch Disease in Wheat and Barley
Source: MDPI journal article supplement (doi:10.3390/genes13122206), 2022-11-24
Supplement: s1 [file s1]

**Table S1.** List of source of *Bipolaris sorokiniana* isolates used in this study.

| Sr no. | Populations locations         | Isolates | Latitude (DMS)     | Host plant | Gene Bank accession |
|--------|-------------------------------|----------|--------------------|------------|---------------------|
| 1.     | Faizabad, Uttar Pradesh       | BBS -1   | 26° 46' 12" N      | Barley     | KT864928            |
| 2.     | Varanasi, Uttar Pradesh       | BBS-3    | 25° 19' 18.0624" N | Barley     | KT864929            |
| 3.     | Ludhiana, Punjab              | BBS-4    | 30° 54' 3.474" N   | Barley     | KT864930            |
| 4.     | Dharwad, Karnataka            | BBS-5    | 16°.14' N          | Barley     | KT864931            |
| 5.     | Dharwad, Karnataka            | WBS-1    | 16°.14' N          | Wheat      | KT864932            |
| 6.     | Gohana, Haryana               | WBS-2    | 29° 8' 18.2652" N  | Wheat      | KT864933            |
| 7.     | Hosangabad, Madhya Pradesh    | WBS-3    | 22° 45' 12.852" N  | Wheat      | KT864934            |
| 8.     | Indore, Madhya Pradesh        | WBS-4    | 22° 43' 10.4448" N | Wheat      | KT864935            |
| 9.     | Meerut, Uttar Pradesh         | WBS-6    | 28° 59' 4.7184" N  | Wheat      | KT884113            |
| 10.    | Muzaffarnagar , Uttar Pradesh | WBS-7    | 29° 26' 0.042" N   | Wheat      | KT884114            |
| 11.    | Pantnagar, Uttarakhand        | WBS-8    | 29° 1' 15.7368" N  | Wheat      | KT884115            |
| 12.    | Pune, Maharashtra             | WBS-9    | 18° 31' 0.2136" N  | Wheat      | KT884116            |
| 13.    | Pusa, Bihar                   | WBS-10   | 25° 59' 5.0496" N  | Wheat      | KT884117            |
| 14.    | Rhotak, Haryana               | WBS-11   | 28° 53' 40.092" N  | Wheat      | KT884118            |
| 15.    | Saharanpur, Haryana           | WBS-12   | 29° 57' 34.8984" N | Wheat      | KT884119            |
| 16.    | Karnal, Haryana               | WBS-13   | 29° 41' 8.2644" N  | Wheat      | KT884120            |
| 17.    | Kurukshetra, Haryana          | WBS-14   | 29° 58' 10.2468" N | Wheat      | KT884121            |
| 18.    | Ludhiana, Punjab              | WBS-15   | 30° 58' 44.1588" N | Wheat      | KT884122            |
| 19.    | Dharwad, Karnataka            | WBS-16   | 15° 20' 49.6896" N | Wheat      | KT884123            |
| 20.    | Gurdaspur, Himachal Pradesh   | WBS-17   | 32°2'30.99"N       | Wheat      | KT884124            |
| 21.    | Shamli, Uttar Pradesh         | WBS-18   | 29° 31' 0" N       | Wheat      | KT884125            |

**Table S2.** Geographical origin, host, isolates, haplotypes information and their accession number of *B. sorokiniana* ITS, *GAPDH* and *TEF 1a* sequences used for genetic analysis.

| Isolates       | Accession No. | Gene | Country             | Host  | Tissue type  | Haplotypes |
|----------------|---------------|------|---------------------|-------|--------------|------------|
| BHU RC 9       | MH209068      | ITS  | India (North India) | wheat | Seed, leaves | H1         |
| MDSN24-D-16    | MH209067      | ITS  | India (North India) | wheat | Seed, leaves | H1         |
| K0911          | MH209066      | ITS  | India (North India) | wheat | Seed, leaves | H1         |
| D6899          | MH209065      | ITS  | India (North India) | wheat | Seed, leaves | H26        |
| UBS2           | MH209063      | ITS  | India (North India) | wheat | Seed, leaves | H1         |
| RAJ3975        | MH209058      | ITS  | India (North India) | wheat | Seed, leaves | H1         |
| BHU RC-8       | MH209057      | ITS  | India (North India) | wheat | Seed, leaves | H1         |
| W              | MH209056      | ITS  | India (North India) | wheat | Seed, leaves | H15        |
| Barley 356     | MH209055      | ITS  | India (North India) | wheat | Seed, leaves | H16        |
| KO-5803        | MH209054      | ITS  | India (North India) | wheat | Seed, leaves | H17        |
| HI1461         | MH209053      | ITS  | India (North India) | wheat | Seed, leaves | H18        |
| S-13           | MH209052      | ITS  | India (North India) | wheat | Seed, leaves | H1         |
| HP-1744        | MH209051      | ITS  | India (North India) | wheat | Seed, leaves | H1         |
| B-4-2-12       | MH209050      | ITS  | India (North India) | wheat | Seed, leaves | H1         |
| B-10-A         | MH209049      | ITS  | India (North India) | wheat | Seed, leaves | H1         |
| MP1261         | MH209047      | ITS  | India (North India) | wheat | Seed, leaves | H1         |
| D-6-1-6        | MH209046      | ITS  | India (North India) | wheat | Seed, leaves | H1         |
| HP1493         | MH209045      | ITS  | India (North India) | wheat | Seed, leaves | H1         |
| BHU RC-6       | MH208996      | ITS  | India (North India) | wheat | Seed, leaves | H1         |
| RAJ4252        | MH209044      | ITS  | India (North India) | wheat | Seed, leaves | H19        |
| T-1            | MH209043      | ITS  | India (North India) | wheat | Seed, leaves | H20        |
| DBW14          | MH209008      | ITS  | India (North India) | wheat | Seed, leaves | H1         |
| BHU RC10       | MH209009      | ITS  | India (North India) | wheat | Seed, leaves | H21        |
| HD2888         | MH209041      | ITS  | India (North India) | wheat | Seed, leaves | H1         |
| MDSN76-DB-16   | MH209040      | ITS  | India (North India) | wheat | Seed, leaves | H1         |
| RSP561         | MH209039      | ITS  | India (North India) | wheat | Seed, leaves | H1         |
| UBS1           | MH209038      | ITS  | India (North India) | wheat | Seed, leaves | H1         |
| 94 LOK 67-19-2 | MH209037      | ITS  | India (North India) | wheat | Seed, leaves | H21        |
| HUW16          | MH209036      | ITS  | India (North India) | wheat | Seed, leaves | H22        |
| BHU RC-1       | MH209035      | ITS  | India (North India) | wheat | Seed, leaves | H1         |
| K1013-1        | MH209034      | ITS  | India (North India) | wheat | Seed, leaves | H24        |
| MP1266, WBI-B  | MH209033      | ITS  | India (North India) | wheat | Seed, leaves | H1         |
| BR3705         | MH209032      | ITS  | India (North India) | wheat | Seed, leaves | H1         |
| S-913-14       | MH209031      | ITS  | India (North India) | wheat | Seed, leaves | H1         |
| B7             | MH209030      | ITS  | India (North India) | wheat | Seed, leaves | H1         |
| HD2329         | MH209029      | ITS  | India (North India) | wheat | Seed, leaves | H1         |
| BHU-RC-4       | MH197356      | ITS  | India (North India) | wheat | Seed, leaves | H1         |
| CG80001        | MH209028      | ITS  | India (North India) | wheat | Seed, leaves | H1         |
| S-13-4-C25     | MH209027      | ITS  | India (North India) | wheat | Seed, leaves | H1         |
| 70B-1002       | MH209026      | ITS  | India (North India) | wheat | Seed, leaves | H1         |
| DBW91          | MH197355      | ITS  | India (North India) | wheat | Seed, leaves | H1         |
| HD3091         | MH209024      | ITS  | India (North India) | wheat | Seed, leaves | H1         |
| SeedR2         | MH209023      | ITS  | India (North India) | wheat | Seed, leaves | H1         |

|                 |          |     |                       |        |              |     |
|-----------------|----------|-----|-----------------------|--------|--------------|-----|
| S-13-3          | MH209022 | ITS | India (North India)   | wheat  | Seed, leaves | H25 |
| BBS -1          | KT864928 | ITS | India (North India)   | Barley | Seed         | H1  |
| BBS-3           | KT864929 | ITS | India (North India)   | Barley | Seed         | H1  |
| BBS-4           | KT864930 | ITS | India (North India)   | Barley | Seed         | H1  |
| BBS-5           | KT864931 | ITS | India (North India)   | Barley | Seed         | H1  |
| WBS-1           | KT864932 | ITS | India (North India)   | wheat  | Seed         | H1  |
| WBS-2           | KT864933 | ITS | India (North India)   | wheat  | Seed         | H1  |
| WBS-3           | KT864934 | ITS | India (North India)   | wheat  | Seed         | H1  |
| WBS-4           | KT864935 | ITS | India (North India)   | wheat  | Seed         | H1  |
| WBS-6           | KT884113 | ITS | India (North India)   | wheat  | Seed         | H1  |
| WBS-7           | KT884114 | ITS | India (North India)   | wheat  | Seed         | H1  |
| WBS-8           | KT884115 | ITS | India (North India)   | wheat  | Seed         | H1  |
| WBS-9           | KT884116 | ITS | India (North India)   | wheat  | Seed         | H1  |
| WBS-10          | KT884117 | ITS | India (North India)   | wheat  | Seed         | H1  |
| WBS-11          | KT884118 | ITS | India (North India)   | wheat  | Seed         | H5  |
| WBS-12          | KT884119 | ITS | India (North India)   | wheat  | Seed         | H1  |
| WBS-13          | KT884120 | ITS | India (North India)   | wheat  | Seed         | H1  |
| WBS-14          | KT884121 | ITS | India (North India)   | wheat  | Seed         | H1  |
| WBS-15          | KT884122 | ITS | India (North India)   | wheat  | Seed         | H1  |
| WBS-16          | KT884123 | ITS | India (North India)   | wheat  | Seed         | H1  |
| WBS-17          | KT884124 | ITS | India (North India)   | wheat  | Seed         | H1  |
| WBS-18          | KT884125 | ITS | India (North India)   | wheat  | Seed         | H1  |
| WLB-18-20       | MK809545 | ITS | India (Central India) | wheat  | NA           | H9  |
| WLB-18-7        | MK809556 | ITS | India (Central India) | wheat  | NA           | H2  |
| Isolate L       | KJ562717 | ITS | India (Central India) | wheat  | NA           | H1  |
| Isolate D2      | KJ562716 | ITS | India (Central India) | wheat  | NA           | H1  |
| Isolate J       | KJ562715 | ITS | India (Central India) | wheat  | NA           | H1  |
| HD3069          | KJ562714 | ITS | India (Central India) | wheat  | NA           | H1  |
| WLB-18-5        | MK809546 | ITS | India (Central India) | wheat  | NA           | H2  |
| WLB-18-8        | MK809555 | ITS | India (Central India) | wheat  | NA           | H2  |
| BS69            | HM195257 | ITS | India (Central India) | wheat  | NA           | H1  |
| Isolate A       | KJ562718 | ITS | India (South India)   | wheat  | NA           | H1  |
| Dharwad         | KJ562719 | ITS | India (South India)   | wheat  | NA           | H1  |
| Isolate SHZ-BH2 | MK640670 | ITS | India (South India)   | wheat  | NA           | H1  |
| BS72            | HM195258 | ITS | India (South India)   | wheat  | NA           | H1  |
| BS75            | HM195259 | ITS | India (South India)   | wheat  | NA           | H1  |
| BS77            | HM195260 | ITS | India (South India)   | wheat  | NA           | H1  |
| BS79            | HM195261 | ITS | India (South India)   | wheat  | NA           | H1  |
| BS92            | HM195262 | ITS | India (South India)   | wheat  | NA           | H1  |
| SHZ-BS-3        | MK777970 | ITS | India (South India)   | wheat  | NA           | H1  |
| WH.PBW.1P.04    | KM066949 | ITS | India (West India)    | wheat  | NA           | H1  |
| WLB-18-13       | MK809551 | ITS | India (West India)    | wheat  | NA           | H2  |
| WB3             | MT804344 | ITS | India (West India)    | wheat  | NA           | H1  |
| WB4             | MT804345 | ITS | India (West India)    | wheat  | NA           | H1  |
| WB6             | MT804347 | ITS | India (West India)    | wheat  | NA           | H1  |
| WB7             | MT804348 | ITS | India (West India)    | wheat  | NA           | H1  |

|                 |            |     |                    |                  |               |     |
|-----------------|------------|-----|--------------------|------------------|---------------|-----|
| WLB-17-2        | MK809564   | ITS | India (West India) | wheat            | NA            | H10 |
| WLB-17-1        | MK809563   | ITS | India (West India) | wheat            | NA            | H11 |
| BS41            | HM195251   | ITS | India (West India) | wheat            | NA            | H1  |
| BS42            | HM195252   | ITS | India (West India) | wheat            | NA            | H1  |
| WLB-18-31       | MK809558   | ITS | India (West India) | wheat            | NA            | H12 |
| WLB-18-9        | MK809561   | ITS | India (West India) | wheat            | NA            | H13 |
| WLB-17-47       | MN535889   | ITS | India (West India) | wheat            | NA            | H14 |
| WLB-18-22       | MK809565   | ITS | India (West India) | wheat            | NA            | H2  |
| WLB-18-33       | MK809566   | ITS | India (West India) | wheat            | NA            | H2  |
| BS-47           | DQ367884   | ITS | India (West India) | wheat            | NA            | H1  |
| B131-2          | LC543651   | ITS | Japan              | Barley           | Spike         | H1  |
| BMup2           | LC543650   | ITS | Japan              | Barley           | Spike         | H1  |
| BM2             | LC543649   | ITS | Japan              | Barley           | Spike         | H1  |
| BO2             | LC543648   | ITS | Japan              | Barley           | Spike         | H1  |
| J1              | MT035843.1 | ITS | China              | Wheat,<br>Barley | NA            | H1  |
| J10             | MT035842.1 | ITS | China              | Wheat,<br>Barley | NA            | H1  |
| GN1             | MN736413.1 | ITS | China              | Wheat,<br>Barley | NA            | H1  |
| YT1-2-2         | KJ026145.1 | ITS | China              | Wheat,<br>Barley | NA            | H1  |
| WK1-3-6         | KJ026144.1 | ITS | China              | Wheat,<br>Barley | NA            | H1  |
| RBC3            | KJ026140.1 | ITS | China              | Wheat,<br>Barley | NA            | H8  |
| isolate 83      | MN534829.1 | ITS | Jordan             | Wheat            | NA            | H1  |
| isolate 49      | MN534803.1 | ITS | Jordan             | Wheat            | NA            | H1  |
| isolate 112     | MN534844.1 | ITS | Jordan             | Wheat            | NA            | H6  |
| isolate 89      | MN534835.1 | ITS | Jordan             | Wheat            | NA            | H1  |
| isolate 54_F    | MN444784.1 | ITS | Morocco            | Barley           | NA            | H1  |
| isolate C404-11 | MN313300.1 | ITS | Canada             | Wheat            | NA            | H1  |
| isolate C109-13 | MN313291.1 | ITS | Canada             | Wheat            | NA            | H1  |
| isolate Mm51    | MK156316.1 | ITS | Iran               | Wheat            | NA            | H1  |
| isolate Mm50    | MK156315.1 | ITS | Iran               | Wheat            | NA            | H1  |
| isolate Mm41    | MK156311.1 | ITS | Iran               | Wheat            | NA            | H1  |
| isolate 72      | MG654434.1 | ITS | Azerbaijan         | Wheat            | root          | H1  |
| isolate 71      | MG654433.1 | ITS | Azerbaijan         | Wheat            | root          | H1  |
| isolate 66      | MG654432.1 | ITS | Azerbaijan         | Wheat            | root          | H1  |
| strain 69       | MG661715.1 | ITS | Azerbaijan         | Wheat            | root          | H1  |
| strain_69       | MK022351.1 | ITS | Azerbaijan         | Wheat            | root          | H1  |
| strain_68       | MK022350.1 | ITS | Azerbaijan         | Wheat            | root          | H1  |
| strainAUMC14512 | MT974154.1 | ITS | Egypt              | Wheat            | Stored grains | H1  |
| isolate Bs12    | MW246488.1 | ITS | Egypt              | Wheat            | Stored grains | H1  |
| isolate Bs13    | MW246567.1 | ITS | Egypt              | Wheat            | Stored grains | H7  |
| isolate TPQ5    | KX137838.1 | ITS | Mexico             | Wheat            | NA            | H1  |
| isolate TPQ4    | KX137837.1 | ITS | Mexico             | Wheat            | NA            | H1  |

|               |            |                                 |                     |                    |      |     |
|---------------|------------|---------------------------------|---------------------|--------------------|------|-----|
| isolate TPQ3  | KX137836.1 | ITS                             | Mexico              | Wheat              | NA   | H1  |
| isolate TPQ2  | KX137835.1 | ITS                             | Mexico              | Wheat              | NA   | H1  |
| isolate 10    | KC616341.1 | ITS                             | Syria               | Barley             | NA   | H3  |
| isolate 49    | KC616339.1 | ITS                             | Syria               | Barley             | NA   | H3  |
| isolate C9    | KC616337.1 | ITS                             | Syria               | Barley             | NA   | H4  |
| isolate 92    | KC616335.1 | ITS                             | Syria               | Barley             | NA   | H4  |
| isolate CS1   | JX145649.1 | ITS                             | USA                 | Wheat              | NA   | H27 |
| ATCC 201653   | JQ070091.1 | ITS                             | USA                 | Wheat              | NA   | H1  |
| ATCC 201652   | JQ070090.1 | ITS                             | USA                 | Wheat              | NA   | H1  |
| TR-Cs-8       | MT271247.1 | ITS                             | Turkey              | Wheat,barley       | Soil | H1  |
| TR-Cs-10      | MT271249.1 | ITS                             | Turkey              | Wheat,<br>Barley   | Soil | H1  |
| TR-Cs-6       | MT271245.1 | ITS                             | Turkey              | Wheat,<br>Barley   | Soil | H1  |
| TR-Cs-4       | MT271243.1 | ITS                             | Turkey              | Wheat,<br>Barley   | Soil | H1  |
| AB-F 67       | KX622098.1 | ITS                             | Russia              | Seed of<br>cereals | NA   | H1  |
| AB-F 83       | KX622114.1 | ITS                             | Russia              | Seed of<br>cereals | NA   | H1  |
| AB-F 81       | KX622112.1 | ITS                             | Russia              | Seed of<br>cereals | NA   | H1  |
| AB-F 79       | KX622110.1 | ITS                             | Russia              | Seed of<br>cereals | NA   | H1  |
| AB-F 61       | KX622092.1 | ITS                             | Russia              | Seed of<br>cereals | NA   | H1  |
| strain 98026P | KF765405.1 | ITS                             | Brazil              | Wheat              | NA   | H1  |
| strain 98023B | KF765406.1 | ITS                             | Brazil              | Wheat              | NA   | H1  |
| strain 98023P | KF765407.1 | ITS                             | Brazil              | Wheat              | NA   | H1  |
| strain 98026C | KF765408.1 | ITS                             | Brazil              | Wheat              | NA   | H1  |
| BHU RC 9      | MH515071   | <i>TEF-<math>\alpha</math>l</i> | India (North India) | wheat              | NA   | H29 |
| MDSN24-D-16   | MH515070   | <i>TEF-<math>\alpha</math>l</i> | India (North India) | wheat              | NA   | H29 |
| K0911         | MH515069   | <i>TEF-<math>\alpha</math>l</i> | India (North India) | wheat              | NA   | H29 |
| D6899         | MH515068   | <i>TEF-<math>\alpha</math>l</i> | India (North India) | wheat              | NA   | H39 |
| UBS2          | MH515067   | <i>TEF-<math>\alpha</math>l</i> | India (North India) | wheat              | NA   | H29 |
| RAJ3975       | MH515066   | <i>TEF-<math>\alpha</math>l</i> | India (North India) | wheat              | NA   | H29 |
| BHU RC-8      | MH515065   | <i>TEF-<math>\alpha</math>l</i> | India (North India) | wheat              | NA   | H29 |
| W             | MH515064   | <i>TEF-<math>\alpha</math>l</i> | India (North India) | wheat              | NA   | H29 |
| Barley 356    | MH515063   | <i>TEF-<math>\alpha</math>l</i> | India (North India) | wheat              | NA   | H29 |
| KO-5803       | MH515062   | <i>TEF-<math>\alpha</math>l</i> | India (North India) | wheat              | NA   | H29 |
| HI1461        | MH515061   | <i>TEF-<math>\alpha</math>l</i> | India (North India) | wheat              | NA   | H29 |
| S-13          | MH515060   | <i>TEF-<math>\alpha</math>l</i> | India (North India) | wheat              | NA   | H29 |
| HP-1744       | MH515059   | <i>TEF-<math>\alpha</math>l</i> | India (North India) | wheat              | NA   | H29 |
| B-4-2-12      | MH515058   | <i>TEF-<math>\alpha</math>l</i> | India (North India) | wheat              | NA   | H29 |
| B-10-A        | MH515057   | <i>TEF-<math>\alpha</math>l</i> | India (North India) | wheat              | NA   | H29 |
| MP1261        | MH515056   | <i>TEF-<math>\alpha</math>l</i> | India (North India) | wheat              | NA   | H29 |
| D-6-1-6       | MH515055   | <i>TEF-<math>\alpha</math>l</i> | India (North India) | wheat              | NA   | H29 |

|                |          |                                 |                     |        |    |     |
|----------------|----------|---------------------------------|---------------------|--------|----|-----|
| HP1493         | MH515054 | <i>TEF-<math>\alpha</math>1</i> | India (North India) | wheat  | NA | H29 |
| BHU RC-6       | MH515005 | <i>TEF-<math>\alpha</math>1</i> | India (North India) | wheat  | NA | H29 |
| RAJ4252        | MH515052 | <i>TEF-<math>\alpha</math>1</i> | India (North India) | wheat  | NA | H29 |
| T-1            | MH515051 | <i>TEF-<math>\alpha</math>1</i> | India (North India) | wheat  | NA | H29 |
| DBW14          | MH515017 | <i>TEF-<math>\alpha</math>1</i> | India (North India) | wheat  | NA | H29 |
| HD2888         | MH515049 | <i>TEF-<math>\alpha</math>1</i> | India (North India) | wheat  | NA | H29 |
| MDSN76-DB-16   | MH515048 | <i>TEF-<math>\alpha</math>1</i> | India (North India) | wheat  | NA | H29 |
| RSP561         | MH515047 | <i>TEF-<math>\alpha</math>1</i> | India (North India) | wheat  | NA | H29 |
| UBS1           | MH515046 | <i>TEF-<math>\alpha</math>1</i> | India (North India) | wheat  | NA | H29 |
| 94 LOK 67-19-2 | MH515045 | <i>TEF-<math>\alpha</math>1</i> | India (North India) | wheat  | NA | H29 |
| HUW16          | MH515044 | <i>TEF-<math>\alpha</math>1</i> | India (North India) | wheat  | NA | H29 |
| BHU RC-1       | MH515043 | <i>TEF-<math>\alpha</math>1</i> | India (North India) | wheat  | NA | H29 |
| K1013-1        | MH515042 | <i>TEF-<math>\alpha</math>1</i> | India (North India) | wheat  | NA | H29 |
| MP1266, WBI-B  | MH515041 | <i>TEF-<math>\alpha</math>1</i> | India (North India) | wheat  | NA | H29 |
| BR3705         | MH515040 | <i>TEF-<math>\alpha</math>1</i> | India (North India) | wheat  | NA | H29 |
| S-913-14       | MH515039 | <i>TEF-<math>\alpha</math>1</i> | India (North India) | wheat  | NA | H29 |
| B7             | MH515038 | <i>TEF-<math>\alpha</math>1</i> | India (North India) | wheat  | NA | H29 |
| HD2329         | MH515037 | <i>TEF-<math>\alpha</math>1</i> | India (North India) | wheat  | NA | H29 |
| BHU-RC-4       | MH515036 | <i>TEF-<math>\alpha</math>1</i> | India (North India) | wheat  | NA | H29 |
| CG80001        | MH515035 | <i>TEF-<math>\alpha</math>1</i> | India (North India) | wheat  | NA | H29 |
| S-13-4-C25     | MH515034 | <i>TEF-<math>\alpha</math>1</i> | India (North India) | wheat  | NA | H29 |
| 70B-1002       | MH515033 | <i>TEF-<math>\alpha</math>1</i> | India (North India) | wheat  | NA | H29 |
| DBW91          | MH515032 | <i>TEF-<math>\alpha</math>1</i> | India (North India) | wheat  | NA | H29 |
| HD3091         | MH515031 | <i>TEF-<math>\alpha</math>1</i> | India (North India) | wheat  | NA | H29 |
| SeedR2         | MH515030 | <i>TEF-<math>\alpha</math>1</i> | India (North India) | wheat  | NA | H29 |
| S-13-3         | MH515029 | <i>TEF-<math>\alpha</math>1</i> | India (North India) | wheat  | NA | H29 |
| B131-2         | LC546960 | <i>TEF-<math>\alpha</math>1</i> | Japan               | Barley | NA | H31 |
| BMup2          | LC546959 | <i>TEF-<math>\alpha</math>1</i> | Japan               | Barley | NA | H31 |
| BM2            | LC546958 | <i>TEF-<math>\alpha</math>1</i> | Japan               | Barley | NA | H31 |
| BO2            | LC546957 | <i>TEF-<math>\alpha</math>1</i> | Japan               | Barley | NA | H31 |
| WLB-18-43      | MW085804 | <i>TEF-<math>\alpha</math>1</i> | India (North India) | wheat  | NA | H33 |
| WLB-18-31      | MW085803 | <i>TEF-<math>\alpha</math>1</i> | India (North India) | wheat  | NA | H34 |
| WLB-18-24      | MW085802 | <i>TEF-<math>\alpha</math>1</i> | India (North India) | wheat  | NA | H33 |
| WLB-18-20      | MW085801 | <i>TEF-<math>\alpha</math>1</i> | India (North India) | wheat  | NA | H33 |
| WLB-18-11      | MW085800 | <i>TEF-<math>\alpha</math>1</i> | India (North India) | wheat  | NA | H33 |
| WLB-18-10      | MW085799 | <i>TEF-<math>\alpha</math>1</i> | India (North India) | wheat  | NA | H35 |
| WLB-18-9       | MW085798 | <i>TEF-<math>\alpha</math>1</i> | India (North India) | wheat  | NA | H33 |
| WLB-18-7       | MW085797 | <i>TEF-<math>\alpha</math>1</i> | India (North India) | wheat  | NA | H33 |
| WLB-18-6       | MW085796 | <i>TEF-<math>\alpha</math>1</i> | India (North India) | wheat  | NA | H36 |
| WLB-18-1       | MW085795 | <i>TEF-<math>\alpha</math>1</i> | India (North India) | wheat  | NA | H30 |
| WLB-17-55      | MW085794 | <i>TEF-<math>\alpha</math>1</i> | India (North India) | wheat  | NA | H37 |
| WLB-17-47      | MW085793 | <i>TEF-<math>\alpha</math>1</i> | India (North India) | wheat  | NA | H30 |
| WLB-17-13      | MW085792 | <i>TEF-<math>\alpha</math>1</i> | India (North India) | wheat  | NA | H33 |
| WLB-17-2       | MW085791 | <i>TEF-<math>\alpha</math>1</i> | India (North India) | wheat  | NA | H30 |
| WLB-17-1       | MW085790 | <i>TEF-<math>\alpha</math>1</i> | India (North India) | wheat  | NA | H30 |
| WLB-10-6       | MW085789 | <i>TEF-<math>\alpha</math>1</i> | India (North India) | wheat  | NA | H38 |

|               |            |                                 |                     |           |        |     |
|---------------|------------|---------------------------------|---------------------|-----------|--------|-----|
| WLB-10-3      | MW085788   | <i>TEF-<math>\alpha</math>I</i> | India (North India) | wheat     | NA     | H33 |
| MAFF 238877   | KM093765.1 | <i>TEF-<math>\alpha</math>I</i> | Japan               | Barley    | NA     | H30 |
| M1            | KM243317.1 | <i>TEF-<math>\alpha</math>I</i> | China               | wheat     | NA     | H32 |
| CPC 28832     | MF490855.1 | <i>TEF-<math>\alpha</math>I</i> | Thailand            | wheat     | NA     | H29 |
| B7            | MZ327275   | <i>TEF-<math>\alpha</math>I</i> | Argentina           | Barley    | seed   | H40 |
| B19           | MW802821   | <i>TEF-<math>\alpha</math>I</i> | Argentina           | Barley    | seed   | H30 |
| B13           | MZ188975   | <i>TEF-<math>\alpha</math>I</i> | Argentina           | Barley    | seed   | H29 |
| K1012         | MH279672   | <i>TEF-<math>\alpha</math>I</i> | India (North India) | wheat     | Leaves | H29 |
| B15           | KJ939504   | <i>TEF-<math>\alpha</math>I</i> | India (North India) | wheat     | Na     | H30 |
| B11           | KJ939501   | <i>TEF-<math>\alpha</math>I</i> | India (North India) | wheat     | Na     | H30 |
| CS1           | JX145648   | <i>GAPDH</i>                    | USA                 | wheat     | Na     | H27 |
| Azerbaijan 69 | MH844821   | <i>GAPDH</i>                    | Azerbaijan          | wheat     | Na     | H27 |
| Azerbaijan 68 | MH844820   | <i>GAPDH</i>                    | Azerbaijan          | wheat     | Na     | H27 |
| Azerbaijan 60 | MH844819   | <i>GAPDH</i>                    | Azerbaijan          | wheat     | Na     | H27 |
| Azerbaijan 15 | MH844818   | <i>GAPDH</i>                    | Azerbaijan          | wheat     | Na     | H27 |
| strain 54-2   | MK024323   | <i>GAPDH</i>                    | Turkey              | wheat     | Na     | H27 |
| strain 47     | MK024322   | <i>GAPDH</i>                    | Turkey              | wheat     | Na     | H27 |
| strain 30-2   | MK024321   | <i>GAPDH</i>                    | Turkey              | wheat     | Na     | H27 |
| strain 23-3   | MK024320   | <i>GAPDH</i>                    | Turkey              | wheat     | Na     | H27 |
| M1            | KR527151   | <i>GAPDH</i>                    | China               | wheat     | Na     | H27 |
| MAFF 238877   | KM034824   | <i>GAPDH</i>                    | Japan               | Barley    | Na     | H27 |
| MAFF 235500   | KM034823   | <i>GAPDH</i>                    | Japan               | Barley    | Na     | H27 |
| Isolate 03    | MT262924   | <i>GAPDH</i>                    | Kazakhstan          | triticale | Na     | H27 |
| isolate 02    | MT262923   | <i>GAPDH</i>                    | Kazakhstan          | triticale | Na     | H27 |
| isolate 01    | MT262922   | <i>GAPDH</i>                    | Kazakhstan          | triticale | Na     | H27 |
| B7            | MZ156796   | <i>GAPDH</i>                    | Argentina           | Barley    | Seed   | H27 |
| B_19          | MW980141   | <i>GAPDH</i>                    | Argentina           | Barley    | Seed   | H28 |
| B13           | MZ327274   | <i>GAPDH</i>                    | Argentina           | Barley    | Seed   | H27 |
